# Supplementary material for: Rapid topographic growth of the Diancang Shan, southeastern margin of the Tibetan Plateau since 5.0–3.5 Ma
Source: Copernicus journal article supplement (doi:10.5194/cp-2024-43), 2024-06-18
Supplement: Supplementary file [file cp-2024-43-AC1-supplement.pdf]

# **Rapid topographic growth of the Diancang Shan, southeastern margin of the Tibetan Plateau since 5.0–3.5 Ma**

**Chunxia Zhang<sup>1,2</sup>, Haibin Wu<sup>1,3</sup>, Xiuli Zhao<sup>2</sup>, Yunkai Deng<sup>1,3</sup>, Yunxia Jia<sup>4</sup>, Wenchao Zhang<sup>1</sup>, Shihu Li<sup>5</sup>, Chenglong Deng<sup>3,5</sup>**

<sup>1</sup>Key Laboratory of Cenozoic Geology and Environment, Institute of Geology and Geophysics, Chinese Academy of Sciences, Beijing 100029, China

<sup>2</sup>College of Earth Science and Engineering, Shandong University of Science and Technology, Qingdao 266590, Shandong Province, China

<sup>3</sup>University of Chinese Academy of Sciences, Beijing, China

<sup>4</sup>School of Geographical Science, Shanxi Normal University, Taiyuan 030031, China

<sup>5</sup>State Key Laboratory of Lithospheric Evolution, Institute of Geology and Geophysics, Chinese Academy of Sciences, Beijing 100029, China

*Correspondence to:* Chunxia Zhang (cxzhang@mail.iggcas.ac.cn)

## **Contents of this file**

Text S1

Figure S1

Table S1, S2

## **Introduction**

This supplementary material contains one section of text (Text S1), one supplementary figure (Figure S1), and two tables (Table S1, S2).

## **Text S1**

### **Climate reconstruction method base on pollen data**

The Modern Analogue Technique (MAT) is a commonly used method for reconstructing past climate ([Overpeck et al., 1985](#)). This approach was based on the measure of the degree of similarity between fossil pollen and modern pollen ([Chevalier et al., 2020](#)).

This analogue-based approach avoided to fit the pollen-climate models, thus outperformed other regression-based approach (such as weighted averaging-partial least squares, WAPLS) (ter Braak and Juggins, 1993; Zhang et al., 2022). However, this approach might suffer from the so-called ‘no-analogue’ problem (Chevalier et al., 2020). The pollen taxa-PFT transformation scheme was later developed to address this problem (Peyron et al., 1998). The plant function types (PFTs) are groups of plants characterized by common phenological and climate constraints, thus the taxa with no modern analog can be replaced by other taxa within the same PFT group (Mauri et al., 2015; Prentice et al., 1992). The PFT-based MAT method has been widely employed in the paleoclimate reconstruction (Davis et al., 2003; Peyron et al., 1998; Zhang et al., 2022).

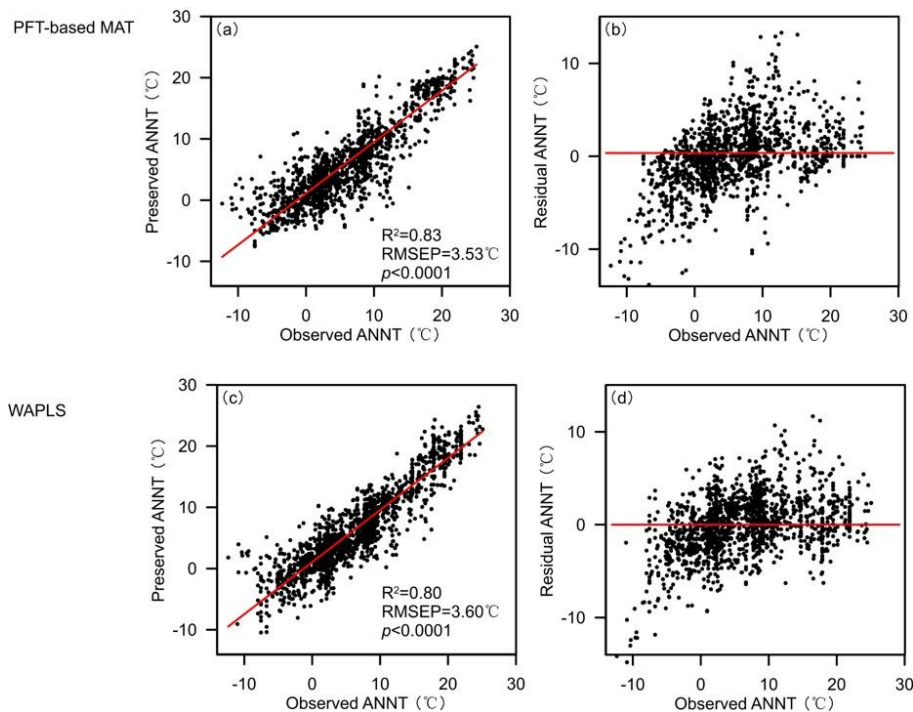

**Figure S1.** Scatter plots and residuals of observed vs. predicted ANNT based on PFT-based Modern Analogue Technique (MAT,  $k=6$ ) and weighted-average partial least squares (WAPLS, component=3) estimated by bootstrapping cross-validation.

**Table S1.** The thickness, lithology of samples for pollen analyses, and the total sum of pollen grains for each sample.

| Thickness (m) | Lithology                | Pollen grain's sum | Thickness (m) | Lithology               | Pollen grain's sum |
|---------------|--------------------------|--------------------|---------------|-------------------------|--------------------|
| <b>965</b>    | Silt clay                | 274                | 536           | Conglomerate, sandstone | 0                  |
| 954           | Shallow-yellow siltstone | 0                  | <b>525</b>    | Silt clay               | 333                |
| 943           | Shallow-yellow sandstone | 2                  | 512           | Sandstone               | 0                  |
| 953           |                          | 0                  | <b>503</b>    | Silt clay               | 317                |
| 924           | Shallow-yellow siltstone | 0                  | 492           | Siltstone               | 0                  |
| 910           |                          | 0                  | <b>481</b>    | Silt clay               | 320                |
| <b>899</b>    | Gray silt clay           | 325                | 470           | Siltstone               | 0                  |
| 865           | Conglomerate, sandstone  | 0                  | <b>459</b>    | Silt clay               | 287                |
| <b>855</b>    | Silt clay                | 270                | 448           | Red sandstone           | 0                  |
| <b>844</b>    |                          | 344                | 437           |                         | 0                  |
| <b>833</b>    | Gray silt clay           | 291                | 426           |                         | 0                  |
| 820           | Conglomerate, sandstone  | 0                  | 415           | Red siltclay, siltstone | 1                  |
| <b>811</b>    | Siltstone                | 310                | 405           |                         | 1                  |
| <b>800</b>    | Light-red siltstone      | 317                | 395           |                         | 0                  |
| 789           | Red siltstone            | 0                  | 385           |                         | 0                  |
| <b>778</b>    |                          | 355                | 370           |                         | 0                  |
| <b>777</b>    | Light-red siltstone      | 288                | 339           | Red siltstone           | 0                  |
| 767           | Gray sandstone           | 0                  | 338           |                         | 0                  |
| <b>756</b>    | Light-red siltstone      | 296                | 322           | Red siltclay            | 0                  |
| 745           |                          | 0                  | 314.6         |                         | 0                  |
| 734           |                          | 0                  | <b>291.6</b>  |                         | 417                |
| 721           | Gray sandstone           | 0                  | <b>258.6</b>  | Peat clay, coal         | 346                |
| 711           |                          | 0                  | <b>248.6</b>  |                         | 305                |
| <b>701</b>    | Silt clay                | 302                | <b>223.6</b>  |                         | 530                |
| 690           |                          | 0                  | 196.6         |                         | 0                  |
| 679           | Siltstone                | 0                  | 189.6         | Yellow sandstone        | 0                  |
| <b>668</b>    |                          | 277                | 183.6         |                         | 0                  |
| <b>657</b>    | Silt clay                | 296                | <b>174.6</b>  |                         | 334                |
| 646           | Siltstone                | 0                  | <b>170.6</b>  |                         | 350                |
| 635           | Sandstone                | 0                  | <b>169.6</b>  |                         | 350                |
| <b>624</b>    | Silt clay                | 305                | <b>168.6</b>  | Peat clay, coal         | 268                |
| 613           |                          | 0                  | <b>155.6</b>  |                         | 364                |
| 604           | Siltstone                | 0                  | <b>146.6</b>  |                         | 354                |
| <b>590</b>    | Silt clay                | 289                | <b>144.6</b>  |                         | 452                |
| 580           | Conglomerate, sandstone  | 0                  | 123.6         |                         | 0                  |
| 569           |                          | 0                  | 113.6         | Sandstone               | 0                  |
| 547           | Silt clay                | 289                | 103.6         |                         | 0                  |

**Table S2.** Thermochronological data from the eastern and southern margins of DCS

| Site                         | Age (Ma) | Range   | Mineral    | Reference             |
|------------------------------|----------|---------|------------|-----------------------|
| Southern<br>margin<br>of DCS | 4.3      | 0.1     | K-feldspar | (Leloup et al., 1993) |
|                              | 4.5      | -       |            |                       |
|                              | 5.0      | -       |            |                       |
|                              | 4.5      | -       |            |                       |
|                              | 4.7      | -       |            |                       |
|                              | 4.5      | -       |            |                       |
|                              | 5.97     | 0.04    | K-feldspar | (Cao et al., 2011)    |
|                              | 4.34     | 0.13    |            |                       |
|                              | 5.0      | -       |            |                       |
|                              | 5.74     | 0.2     |            |                       |
| 7.0                          | -        |         |            |                       |
| 4.58                         | 0.15     |         |            |                       |
| 7.64                         | 0.04     |         |            |                       |
| 5.1                          | 0.27     |         |            |                       |
| 6.44                         | 0.14     |         |            |                       |
| 6.4                          | 0.3      | Biotite |            |                       |
| Eastern<br>margin<br>of DCS  | 6.6      | 1.3     | Biotite    |                       |
|                              | 5.9      | 0.4     | K-feldspar |                       |
|                              | 4.21     | 0.02    |            |                       |
|                              | 3.48     | 0.17    |            |                       |
|                              | 3.99     | 0.13    |            |                       |
|                              | 3.59     | 0.06    |            |                       |
|                              | 4.4      | 0.11    |            |                       |
|                              | 5.96     | 0.82    |            |                       |
|                              | 4.67     | 0.57    |            |                       |
|                              | 6.44     | 0.05    |            |                       |
|                              | 5.22     | 0.42    |            |                       |
|                              | 5.54     | 1.25    |            |                       |
|                              | 5.44     | 0.96    |            |                       |
|                              | 7.72     | 0.54    | Apatite    | (Li et al., 2012)     |
|                              | 8.22     | 0.09    |            |                       |
|                              | 6.47     | 1.02    |            |                       |
|                              | 4.15     | 2.65    |            |                       |
|                              | 5.82     | 0.44    |            |                       |
|                              | 6.02     | 0.12    |            |                       |
|                              | 4.28     | 0.02    |            |                       |
| 3.53                         | 0.17     |         |            |                       |
| 4.04                         | 0.13     |         |            |                       |
| 3.63                         | 0.06     |         |            |                       |
| 4.46                         | 0.11     |         |            |                       |
| 6.07                         | 0.82     |         |            |                       |
| 4.8                          | 0.57     |         |            |                       |

|      |      |        |                    |
|------|------|--------|--------------------|
| 6.52 | 0.05 |        |                    |
| 5.36 | 0.43 |        |                    |
| 5.71 | 1.26 |        |                    |
| 5.59 | 0.96 |        |                    |
| 7.83 | 0.55 |        |                    |
| 3.79 | 0.09 |        |                    |
| 6.63 | 1.03 |        |                    |
| 8.74 | 0.11 |        |                    |
| 4.44 | -    |        |                    |
| 6.1  | 0.44 |        |                    |
| 2.72 | 0.47 | Illite | (Han et al., 2011) |

## References

- Cao, S.Y., Neubauer, F., Liu, J.L., Genser, J. & Leiss, B. (2011). Exhumation of the Diancang Shan metamorphic complex along the Ailao Shan-Red River belt, southwestern Yunnan, China: Evidence from  $^{40}\text{Ar}/^{39}\text{Ar}$  thermochronology. *Journal of Asian Earth Sciences*, 42, 525-550.
- Chevalier, M., Davis, B.A.S., Heiri, O. et al. (2020). Pollen-based climate reconstruction techniques for late Quaternary studies. *Earth-Science Reviews*, 210, 103384.
- Davis, B.A.S., Brewer, S., Stevenson, A.c. & Guiot, J. (2003). The temperature of Europe during the Holocene reconstructed from pollen data. *Quaternary Science Reviews*, 22, 1701-1716.
- Fan, C., Wang, G., Wang, S.F. & Wang, E. (2006). Structural interpretation of extensional deformation along the Dali fault system, southeastern margin of the Tibetan plateau. *International Geology Review*, 48(4), 287-310.
- Han, S.Q., Chen, Q.L. & Zhang, Y.S. (2011). K-Ar age of authigenic illite in fault gouge in the northern section of Red River fault and geological significance (in Chinese). *Quaternary Sciences*, 27(6), 1129-1130.
- Leloup, P.H., Harrison, T.M., Ryerson, F.J. et al. (1993). Structural, petrological and thermal evolution of a tertiary ductile strike-slip shear zone, Diancang shan, Yunnan. *Journal of Geophysical Research*, 98(B4), 6715-6743.
- Li, B.L., Ji, J.Q., Lo, C.H., Gong, J.F. & Qing, J.C. (2012). The structural style and timing of uplift of the Ailao Shan- Diancang Range, West Yunnan, China (in Chinese with English abstract). *Seismology and Geology*, 34(4), 696-712.
- Liu, J., Tang, L., Qiao, Y., Head, M.J. & Walker, D. (1986). Late Quaternary vegetation history at Menghai, Yunnan province, southwest China. *Journal of Biogeography*, 13, 399-418.
- Mauri, A., Davis, B.A.S., Collins, P.M. & Kaplan, J.O. (2015). The climate of Europe during the Holocene: a gridded pollen-based reconstruction and its multi-proxy evaluation. *Quaternary Science Reviews*, 112, 109-127.

- Ming, T.L.& Fang, R.Z. (1982). The vegetation on Cangshan Yunnan and the distribution of genus *Rhododendron* (in Chinese with English abstract). *Acta Botanica Yunnanica*, 4(4), 383-391.
- Overpeck, J.T., Webb, T.& Prentice, I.C. (1985). Quantitative interpretation of fossil pollen spectra: Dissimilarity coefficients and the method of modern analogs. *Quaternary Research*, 23(1), 87-108.
- Peyron, O., Guiot, J., Cheddadi, R. et al. (1998). Climatic Reconstruction in Europe for 18,000 YR B.P. from Pollen Data. *Quaternary Research*, 49(2), 183-196.
- Prentice, I.C., Cramer, W., Harrison, S.P. et al. (1992). Special Paper: A Global Biome Model Based on Plant Physiology and Dominance, Soil Properties and Climate. *Journal of Biogeography*, 19(2).
- Shen, J., Jones, R.T., Yang, X.D., Dearing, J.A.& Wang, S.M. (2006). The Holocene vegetation history of Lake Erhai, Yunnan province southwestern China: the role of climate and human forcings. *The Holocene*, 16(2), 265-276.
- Sun, A.Z., Luo, Y.L., Wu, H.B. et al. (2020). An updated biomization scheme and vegetation reconstruction based on a synthesis of modern and mid-Holocene pollen data in China. *Global and Planetary Change*, 192, 103178.
- ter Braak, C.J.F.& Juggins, S. (1993). Weighted averaging partial least squares regression (WA-PLS): an improved method for reconstructing environmental variables from species assemblages. *Hydrobiologia*, 269(1), 485-502.
- Zhang, W.C., Wu, H.B., Cheng, J. et al. (2022). Holocene seasonal temperature evolution and spatial variability over the Northern Hemisphere landmass. *Nature Communications*, 13(1), 5334.
